# Supplementary material for: Ratio fluorescence analysis of T4 polynucleotide kinase activity based on the formation of a graphene quantum dot–copper nanocluster nanohybrid
Source: Royal Society of Chemistry journal article supplement (doi:10.1039/c9nr02901j), 2019-01-01
Supplement: c9nr02901j1.pdf [file c9nr02901j1.pdf]

## Supplementary Information

### **Ratio fluorescence analysis of T4 polynucleotide kinase activity based on the formation of a graphene quantum dot-copper nanocluster nanohybrid**

Mengke Wang <sup>a</sup>, Deshuai Kong <sup>b</sup>, Dandan Su <sup>a</sup>, Yang Liu <sup>a</sup>, Xingguang Su <sup>a,\*</sup>

*<sup>a</sup> Department of Analytical Chemistry, College of Chemistry, Jilin University, Changchun 130012, PR China*

*<sup>b</sup> State Key Laboratory on Integrated Optoelectronics, College of Electronic Science and Engineering, Jilin University, Changchun 130012, PR China*

\*Corresponding author

Tel.: +86-431-85168352

E-mail address: [suxg@jlu.edu.cn](mailto:suxg@jlu.edu.cn)

## Chemicals and characterizations

Copper (II) sulfate pentahydrate ( $\text{CuSO}_4 \cdot 5\text{H}_2\text{O}$ ), citric acid ( $\text{C}_6\text{H}_8\text{O}_7 \cdot \text{H}_2\text{O}$ ), ammonia ( $\text{NH}_3 \cdot \text{H}_2\text{O}$ , 25.0-28.0%), 1-ethyl-3-[3-di-methylaminopropyl] carbodiimide hydrochloride (EDC) and sodium ascorbate were purchased from Aladdin Reagent Co., Ltd. T4 polynucleotide kinase (T4 PNK), 5 $\times$  T4 PNK reaction buffer (700 mM trizma hydrochloride (Tris-HCl), 100 mM magnesium chloride ( $\text{MgCl}_2$ ), 50 mM dithiothreitol (DTT), pH = 7.6), lambda exonuclease ( $\lambda$  exo), 10 $\times$   $\lambda$  exo reaction buffer (670 mM glycine-potassium hydroxide (KOH), 25 mM  $\text{MgCl}_2$ , 0.1% (v/v) triton X-100, pH = 9.4), adenosine triphosphate (ATP) and pyrophosphatase (PPase) were bought from Sangon Biotech Co., Ltd. Tyrosinase, pepsin, lysozyme, urease and thrombin were obtained from Sigma-Aldrich Corporation. The 5'-amino-capped DNA strand 1 (DNA 1): 5'- $\text{NH}_2$ -ATATATATATATACGGCAATTAATTAATTA-3', and DNA strand 2 (DNA 2): 5'-TAATTAATTAATTGCCGTATATATATATATAT-3' were synthesized and purified by Sangon Biotech Co., Ltd.

Fluorescence measurements were conducted by a Shimadzu RF-5301 PC spectrofluorophotometer equipped with a xenon lamp. Transmission electron microscopy (TEM) and high resolution TEM (HRTEM) were performed by the Hitachi H-800 electron microscope. Fourier transform infrared (FT-IR) spectra were recorded on a Nicolet 400 Fourier transform infrared spectrometer. Dynamic light scattering (DLS) measurement were performed by a Zetasizer Nano ZS90 analyzer at 25 °C. Electrochemical impedance spectroscopy (EIS) was conducted on the CHI 660B electrochemical workstation in 2.5 mM  $\text{K}_3[\text{Fe}(\text{CN})_6]/\text{K}_4[\text{Fe}(\text{CN})_6]$  with 0.1 M KCl as the supporting electrolyte and a glassy carbon electrode (GCE) was used.

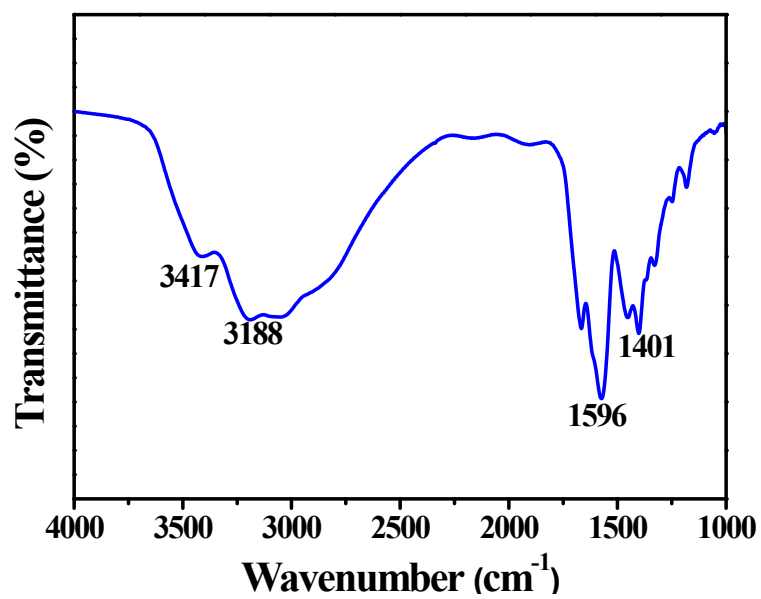

Fig. S1 FT-IR spectra of GQDs.

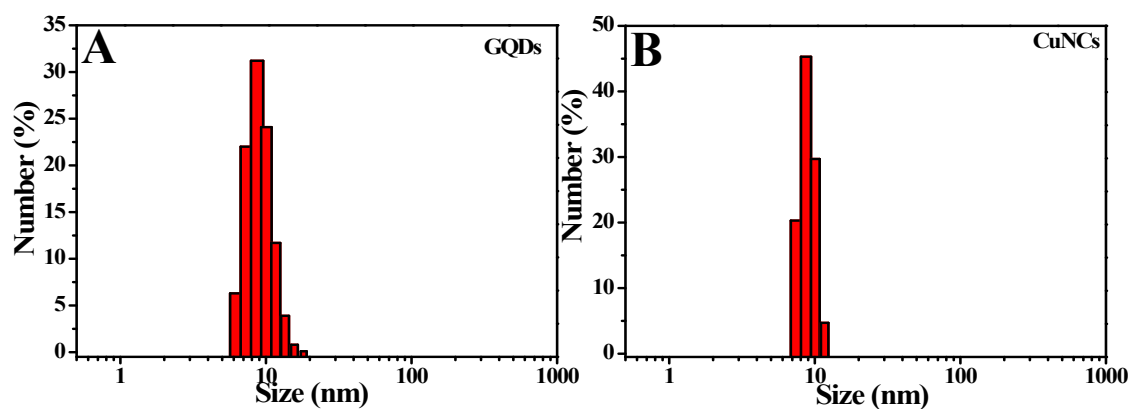

Fig. S2 Dynamic light scattering analysis of GQDs (A) and CuNCs (B).

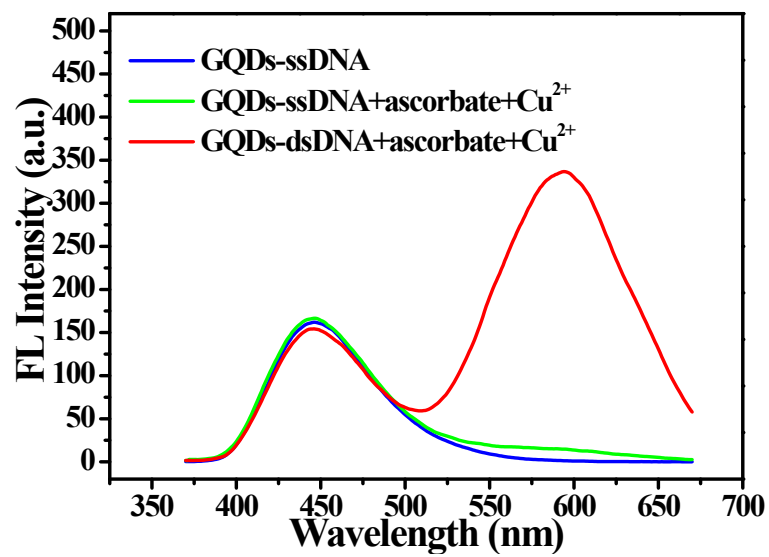

**Fig. S3** Fluorescence emission spectra of GQDs-ssDNA, GQDs-ssDNA/ascorbate/Cu<sup>2+</sup> and GQDs-dsDNA/ascorbate/Cu<sup>2+</sup> system.

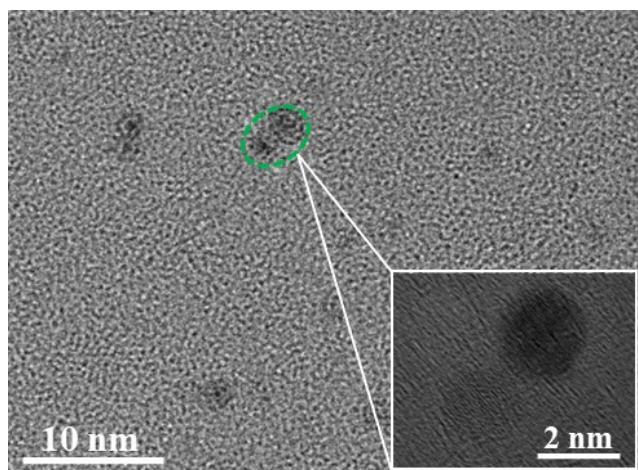

**Fig. S4** TEM images of GQDs-CuNCs nanohybrid.

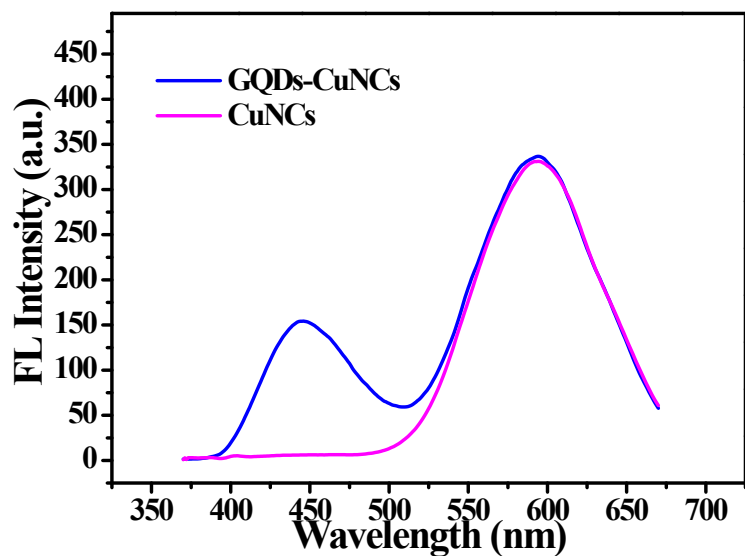

Fig. S5 Fluorescence emission spectra of GQDs-CuNCs nanohybrid and CuNCs.

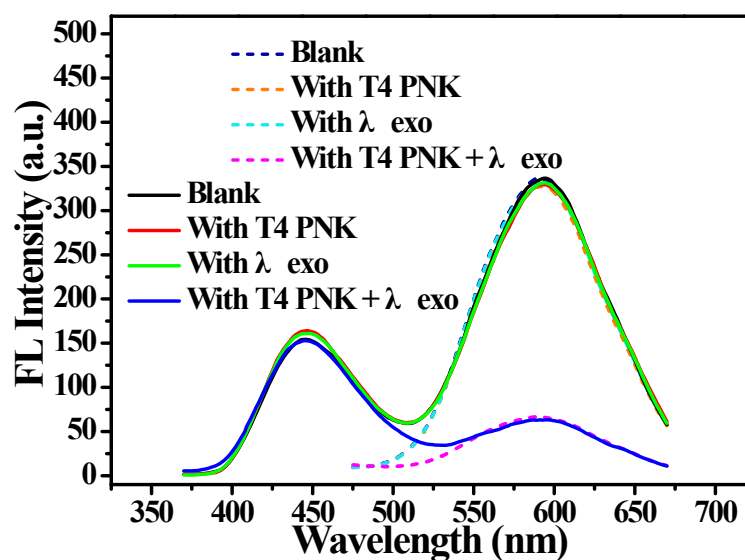

Fig. S6 Fluorescence emission spectra of the GQDs-dsDNA/ascorbate/ $\text{Cu}^{2+}$  (solid line) and dsDNA/ascorbate/ $\text{Cu}^{2+}$  (dash line) reaction system treated with T4 PNK,  $\lambda$  exo and T4 PNK/ $\lambda$  exo.

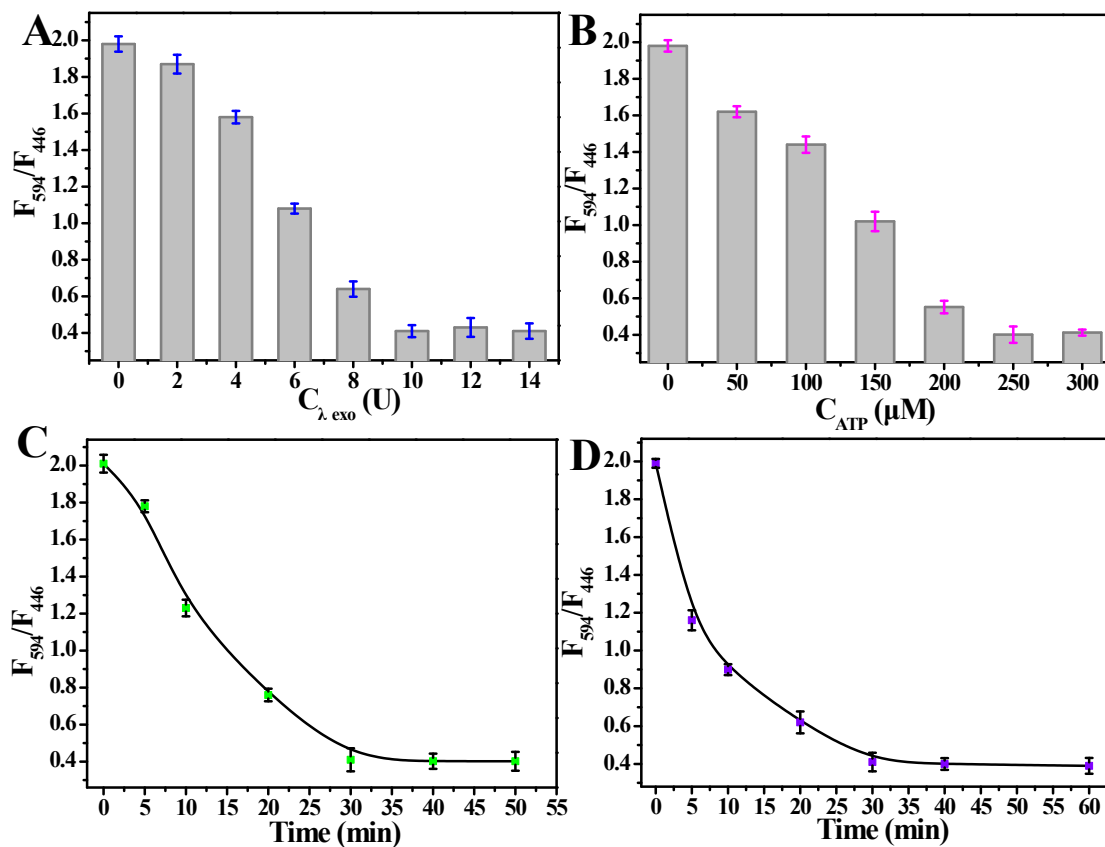

**Fig. S7** Effect of  $\lambda_{exo}$  (A), ATP concentration (B), T4 PNK phosphorylation time (C),  $\lambda_{exo}$  cleavage reaction time (D) on the fluorescence intensity ratio  $F_{594}/F_{446}$ .

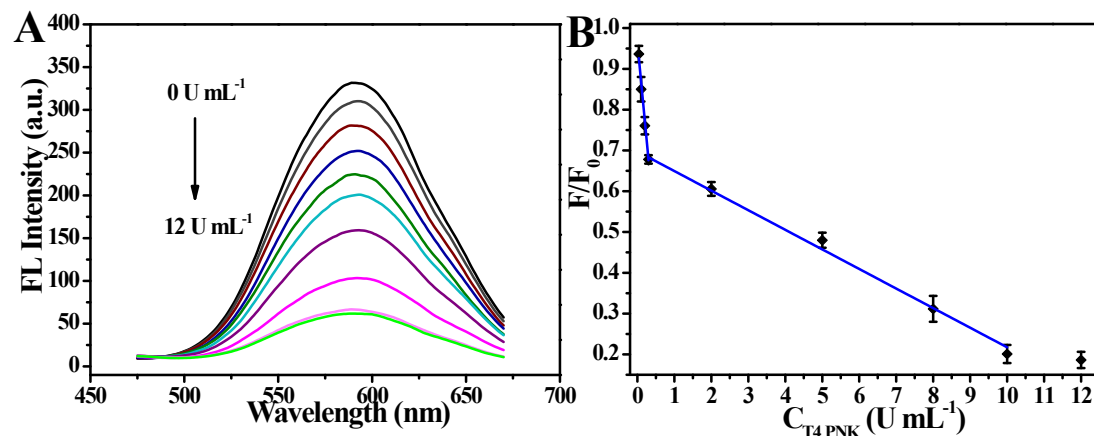

**Fig. S8** (A) Fluorescence emission spectra of dsDNA/T4 PNK/ $\lambda_{exo}$ /ascorbate/ $Cu^{2+}$  reaction system with various concentrations T4 PNK. (B) The linearity of the fluorescence intensity ratio ( $F/F_0$ ) versus T4 PNK concentration. F and  $F_0$  were the FL intensity of dsDNA/T4 PNK/ $\lambda_{exo}$ /ascorbate/ $Cu^{2+}$  system in the presence and absence of T4 PNK, respectively.

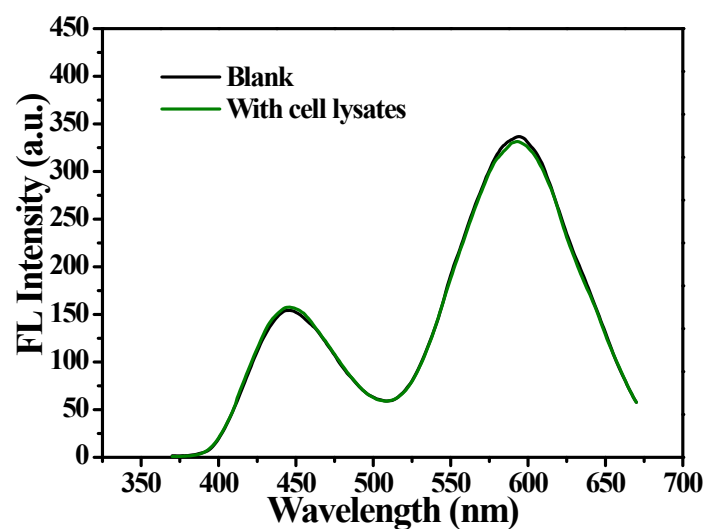

**Fig. S9** Fluorescence emission spectra of GQDs-CuNCs and GQDs-CuNCs/cell lysates (10%) system.

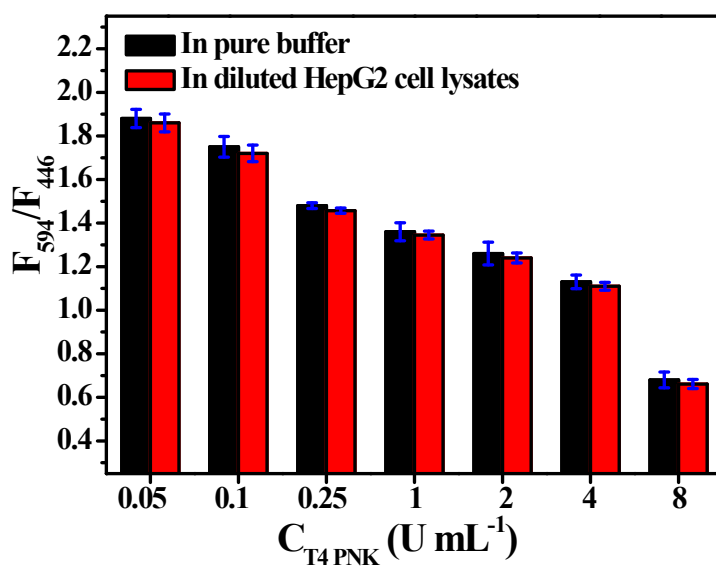

**Fig. S10** Fluorescence response for detecting T4 PNK activity in pure buffer and diluted cell lysates (10%) respectively.

**Table S1** Comparison of different fluorescence methods for T4 PNK detection.

| Material                       | Linear range<br>(U mL <sup>-1</sup> ) | LOD<br>(U mL <sup>-1</sup> ) | References |
|--------------------------------|---------------------------------------|------------------------------|------------|
| Deoxyguanosines/FAM            | 0.005-10                              | 0.0021                       | 1          |
| Graphene oxide/exonuclease III | 0-0.2                                 | 0.003                        | 2          |
| Perylene                       | 0-0.08                                | 0.003                        | 3          |
| Allosteric aptamer probe       | 0-1                                   | 0.01                         | 4          |
| FAM/cobalt oxyhydroxide        | 0.01-1                                | 0.01                         | 5          |
| PFP/SYBR Green I               | 0.001-5                               | 0.001                        | 6          |
| FAM/polydopamine nanospheres   | 0.01-2.5                              | 0.01                         | 7          |
| $\beta$ -cyclodextrin polymer  | 0-0.25                                | 0.02                         | 8          |
| GQDs-CuNCs                     | 0.01-10                               | 0.0037                       | This work  |

### Notes and references

- 1 M. Tao, Z. Shi, R. Cheng, J. Zhang, B. Li and Y. Jin, *Analytical Biochemistry*, 2015, **485**, 18-24.
- 2 N.-N. Sun, R.-M. Kong, F. Qu, X. Zhang, S. Zhang and J. You, *Analyst*, 2015, **140**, 1827-1831.
- 3 H. Jiao, B. Wang, J. Chen, D. Liao and C. Yu, *Chemical Communications*, 2012, **48**, 7862-7864.
- 4 M. Gao, J. Guo, Y. Song, Z. Zhu and C. J. Yang, *Acs Applied Materials & Interfaces*, 2017, **9**, 38356-38363.
- 5 Y. Cen, Y. Yang, R.-Q. Yu, T.-T. Chen and X. Chu, *Nanoscale*, 2016, **8**, 8202-8209.
- 6 S. Lian, C. Liu, X. Zhang, H. Wang and Z. Li, *Biosensors & Bioelectronics*, 2015, **66**, 316-320.
- 7 Y. Cen, W.-J. Deng, R.-Q. Yu and X. Chu, *Talanta*, 2018, **180**, 271-276.
- 8 C. Song, X. Yang, K. Wang, Q. Wang, J. Liu, J. Huang, L. He, P. Liu, Z. Qing and W. Liu, *Chemical Communications*, 2015, **51**, 1815-1818.
